# Supplementary material
Source: publisher figshare collection journal article supplement (https://frontiersin.figshare.com/ndownloader/files/31637228)
Supplement: Supplementary file [file 31637228]

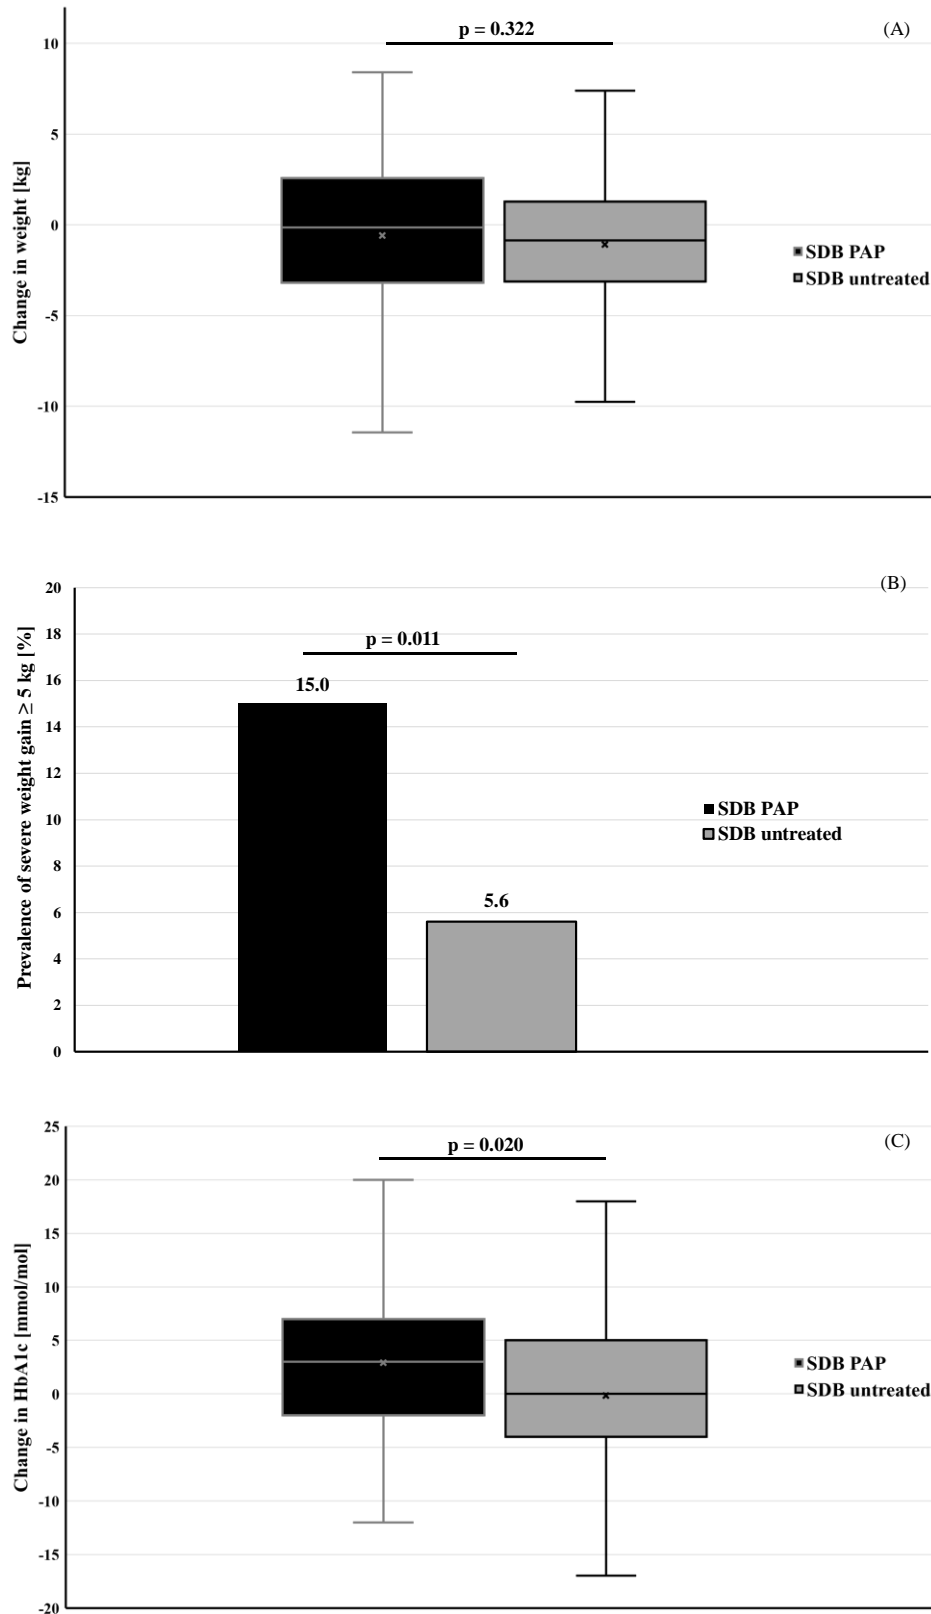

**Supplementary Figure 1.** (A) Mean weight change was similar in SDB patients with and without PAP treatment. However, patients with type 2 diabetes mellitus and PAP treatment have (B) an increased risk of severe long-term weight gain and (C) an increase in HbA1c. HbA1c = hemoglobin A1c; PAP = positive airway pressure; SDB = sleep-disordered breathing.
